# Supplementary material for: Fucoidan Inhibits NLRP3 Inflammasome Activation by Enhancing p62/SQSTM1-Dependent Selective Autophagy to Alleviate Atherosclerosis
Source: Hindawi journal article supplement (doi:10.1155/2020/3186306), 2020-08-06
Supplement: f1 [file 3186306.f1.pdf]

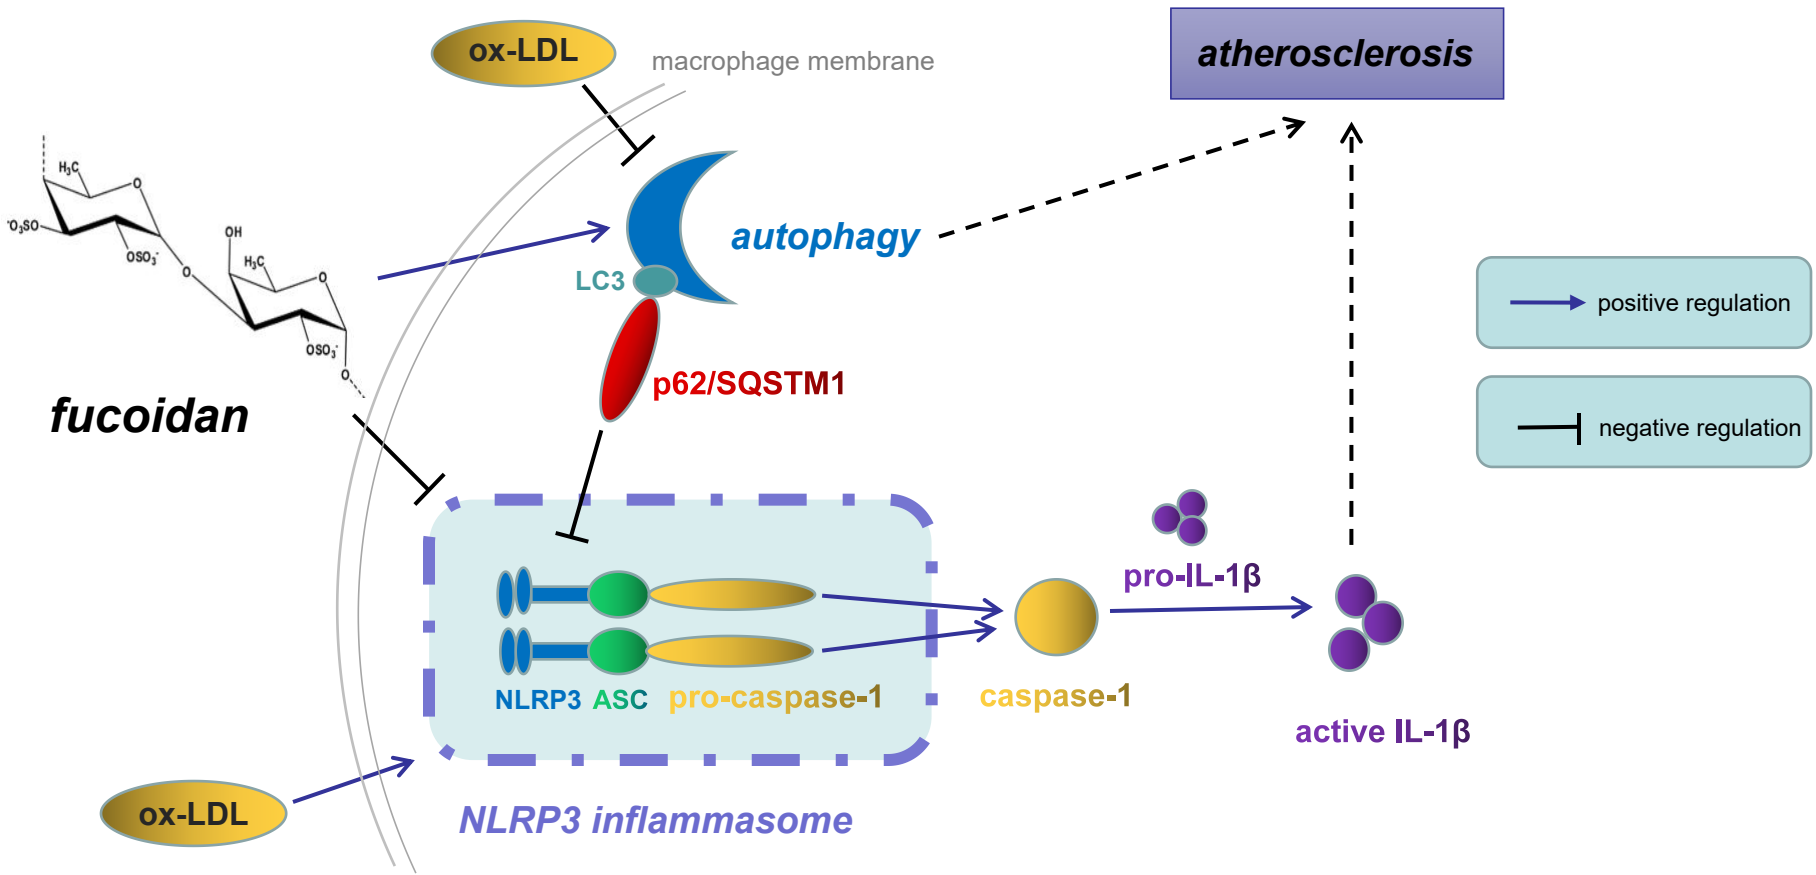

The chemical structure of fucoidan purified from *Fucus vesiculosus*. Fucoidan alleviates atherosclerosis via enhancing selective autophagy and inhibiting NLRP3 inflammasome activation.
